# Supplementary material
Source: PubMed Central journal article supplement (PMC3294441)
Supplement: supp_11.3.368_FigS1.pdf [file supp_11.3.368_FigS1.pdf]

[illegible]
