# Supplementary material
Source: PubMed Central journal article supplement (PMC3294441)
Supplement: supp_11.3.368_SuppText.pdf [file supp_11.3.368_SuppText.pdf]

## Supplementary files

### Supplementary tables

**Table S1** Genes commonly deregulated in  $\Delta ncr1$  and  $\Delta N-Ncr1$  sporidia 2 h after transfer from ammonium minimal medium to nitrogen starvation medium.

**Table S2** Classification of genes regulated in both  $\Delta ncr1$  and  $\Delta N-Ncr1$  on nitrogen starvation medium into functional categories (FunCats).

**Table S3** Genes commonly deregulated in both  $\Delta ncr1$  and  $\Delta ton1$  sporidia 2 h after transfer from ammonium minimal medium to nitrogen starvation medium.

**Table S4** Classification of genes regulated in both  $\Delta ncr1$  and  $\Delta ton1$  on nitrogen starvation medium into functional categories (FunCats).

### Supplementary figures

**Figure S1** Full protein sequence alignment of NiT2 homologs. Multiple sequence alignment was executed using the MUSCLE algorithm (Edgar, 2004).

**Figure S2** Filament formation on  $\Delta ton1$  and  $\Delta ncr1$  on charcoal plates. Sporidia were grown in YEPS<sub>light</sub> medium over night, washed with ddH<sub>2</sub>O and diluted to an OD<sub>600</sub> of 0.1 and 5  $\mu$ L of each suspension were spotted twice on PD charcoal plates. Photos were taken after 4 d incubation at 28°C.

**Figure S3** Thin layer chromatography of glycolipids isolated from SG200 and  $\Delta N-Nit2$  sporidia grown for 3 d on YNB nitrogen starvation medium. Approximately 10  $\mu$ g of glycolipids from two independent cultures per genotype were loaded. The glycolipid composition of  $\Delta N-Nit2$  (left two lanes) did not differ from the one of SG200 sporidia (right two lanes).

### Supplementary material and methods

#### *Glycolipid isolation and determination*

Glycolipids were extracted using a protocol adapted from (Josephs, 2004).

*Ustilago maydis* sporidia were cultivated on AMM over night and transferred to 1 L YNB (yeast nitrogen base) medium, which contains no nitrogen source, supplemented with 5% glucose for 3 days. Cells were harvested by centrifugation (20 min at room temperature and 4000 rpm) and the pellet was resuspended in 200 mL methanol and heated to 30°C. After centrifugation (20 min, room

temperature, 4000 rpm), the cell pellet was discarded and the supernatant mixed with 1.8 L 50°C hot ddH<sub>2</sub>O. The suspension was cool to room temperature over night. Crystallized glycolipids were harvested by centrifugation and washed subsequently with 100 mL ddH<sub>2</sub>O and 20 mL diethyl ether and dried at room temperature. Separation of glycolipids occurred by TLC as described (Hewald *et al.*, 2005).

### **Supplementary literature cited**

- Edgar, R. C., (2004) MUSCLE: multiple sequence alignment with high accuracy and high throughput. *Nucl. Acids Res.* 32: 1792-1797.
- Hewald, S., K. Josephs, and M. Bolker, (2005) Genetic analysis of biosurfactant production in *Ustilago maydis*. *Applied and Environmental Microbiology* 71: 3033-3040.
- Josephs, K. A., (2004) Untersuchungen zur Bildung von Cellobioselipiden (Ustilaginsäure) in *Ustilago maydis*. In: Fachbereich Biologie. Marburg: Philipps-University Marburg, pp. 118.
