# Supplementary material
Source: PubMed Central journal article supplement (PMC3294441)

**SG200**

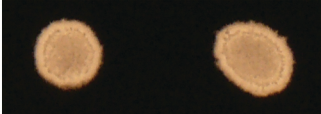

**$\Delta$ ton1**

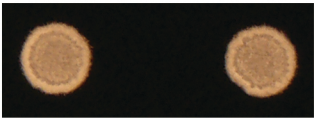

**$\Delta$ nit2**

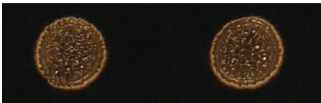

Supplement: supp_11.3.368_FigS2.pdf [file supp_11.3.368_FigS2.pdf]

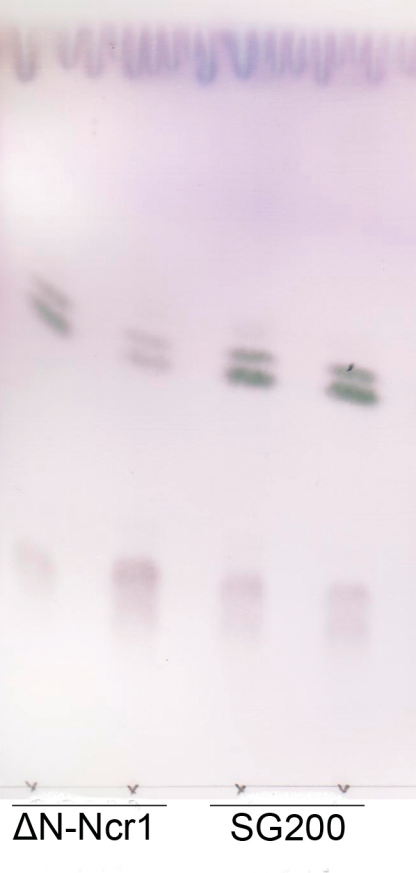

$\Delta N$ -Ncr1

SG200

Supplement: supp_11.3.368_FigS3.pdf [file supp_11.3.368_FigS3.pdf]
